# Supplementary material for: Modular high power plant lighting sources based on phosphor–sapphire composites with high thermal conductivity
Source: Royal Society of Chemistry journal article supplement (doi:10.1039/d2tc03275a), 2022-01-01
Supplement: d2tc03275a1.pdf [file d2tc03275a1.pdf]

## Supporting Information

### Modular high power plant lighting sources based on phosphor-sapphire composite with high thermal conductivity

Jiayu Zhang<sup>a</sup>, Xikun Zou<sup>a</sup>, Lei Jin<sup>a</sup>, Jiamin Sun<sup>a</sup>, Bohua Zhang<sup>a</sup>, Wei Li<sup>a</sup>, Haoran Zhang<sup>a,b</sup>, Mingtao Zheng<sup>a,b</sup>, Yingliang Liu<sup>a</sup>, Xiaotang Liu<sup>a,\*</sup>, Xuejie Zhang<sup>a,\*</sup>, and Bingfu Lei<sup>a,b,\*</sup>

<sup>a</sup>Key Laboratory for Biobased Materials and Energy of Ministry of Education, College of Materials and Energy, South China Agricultural University, Guangzhou 510642, China

<sup>b</sup>Maoming Branch, Guangdong Laboratory for Lingnan Modern Agriculture, Guangdong Maoming 525100, China

**\*Corresponding Author:**

\*Xuejie Zhang, zhangxuejie@scau.edu.cn;

\*Xiaotang Liu, xtliu@scau.edu.cn;

\*Bingfu Lei, tleibf@scau.edu.cn;

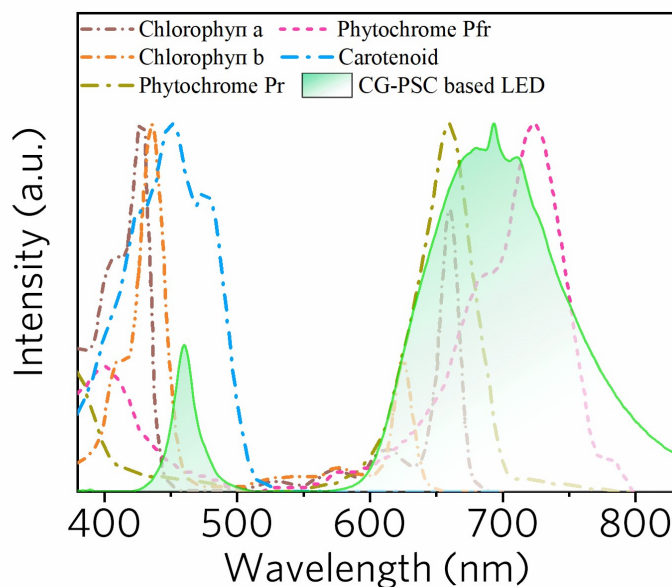

**Fig. S1.** Absorption curves of different pigments in plants and the emission spectrum of CG-PSC based plant growth LED.

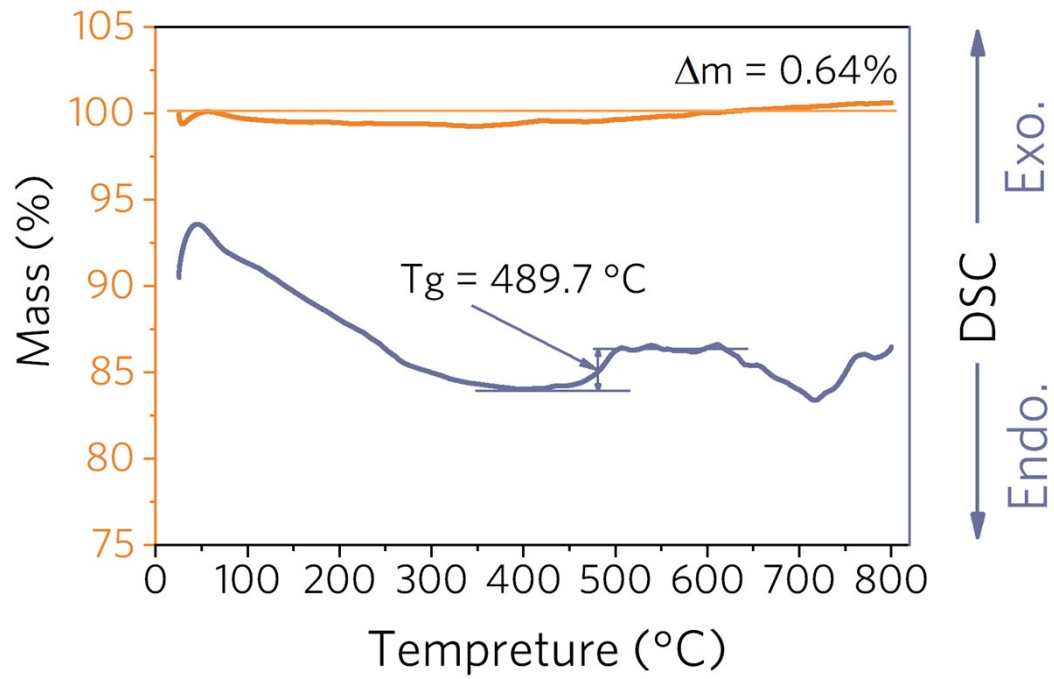

**Fig. S2.** TG and DSC curves of host glass.

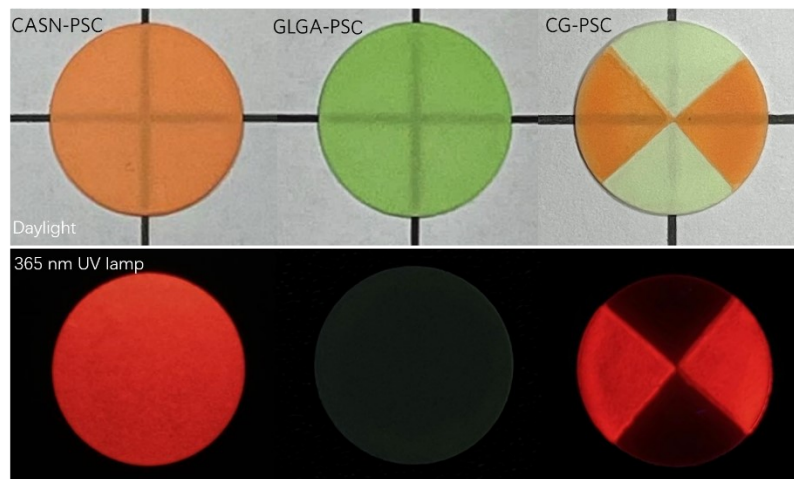

**Fig. S3.** Photos of CASN-PSC, GLGA-PSC, and CG-PSC samples under daylight and 365 nm UV lamp.

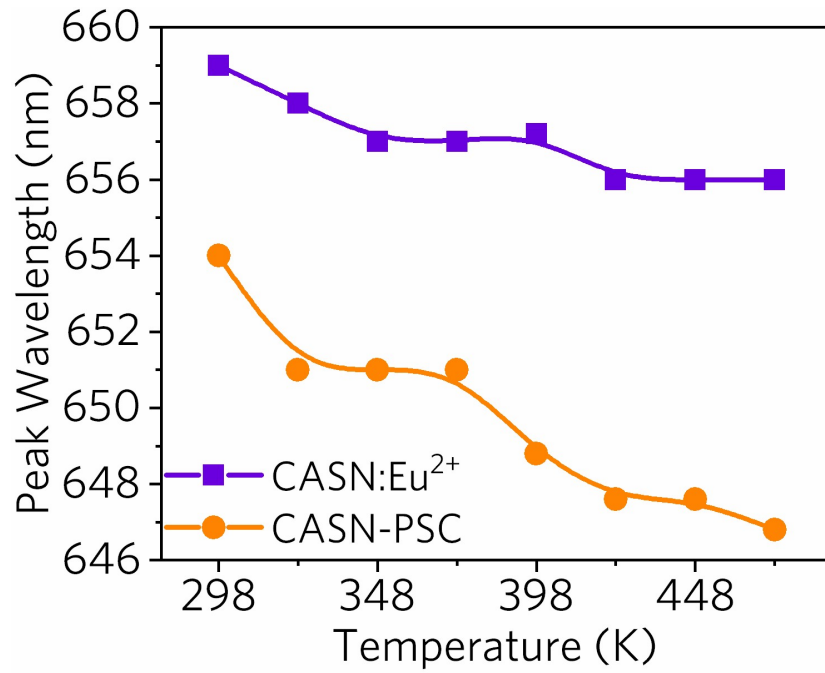

**Fig. S4.** Temperature-dependent peak emission wavelengths of CASN:Eu<sup>2+</sup> and CASN-PSC.

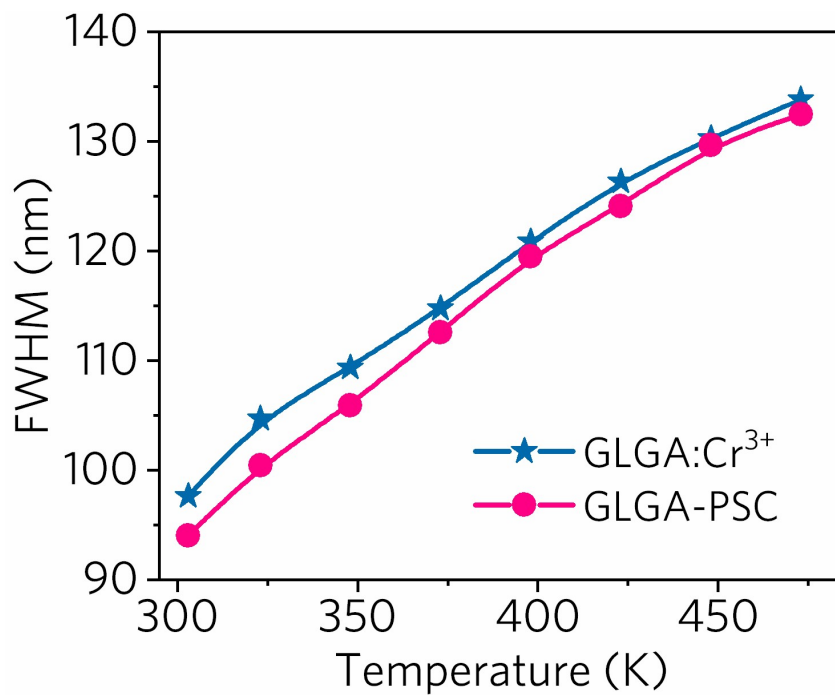

**Fig. S5.** Temperature-dependent FWHMs of GLGA:Cr<sup>3+</sup> and GLGA-PSC.

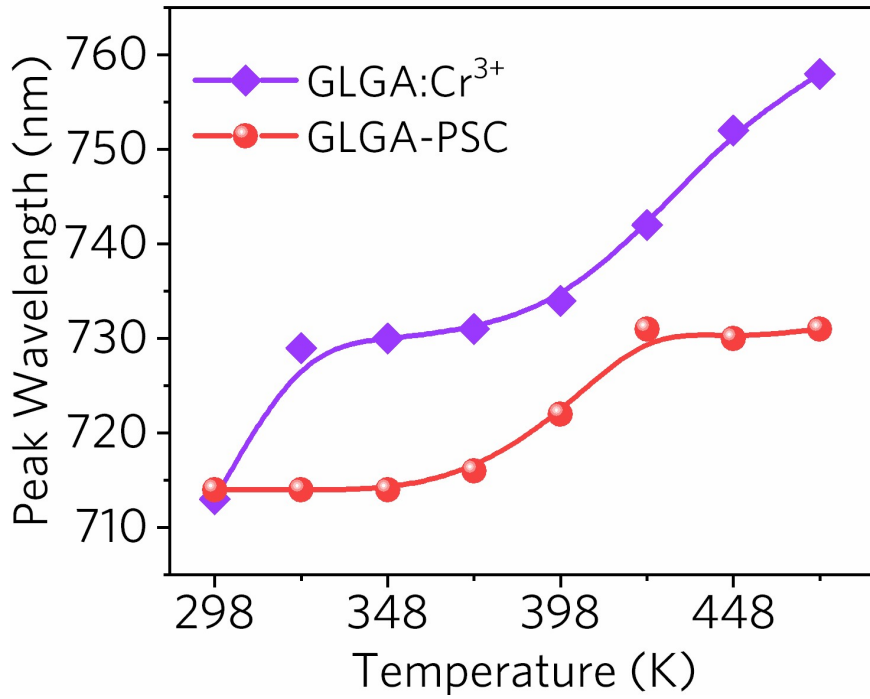

**Fig. S6.** Temperature-dependent peak emission wavelengths of GLGA:Cr<sup>3+</sup> and GLGA-PSC.

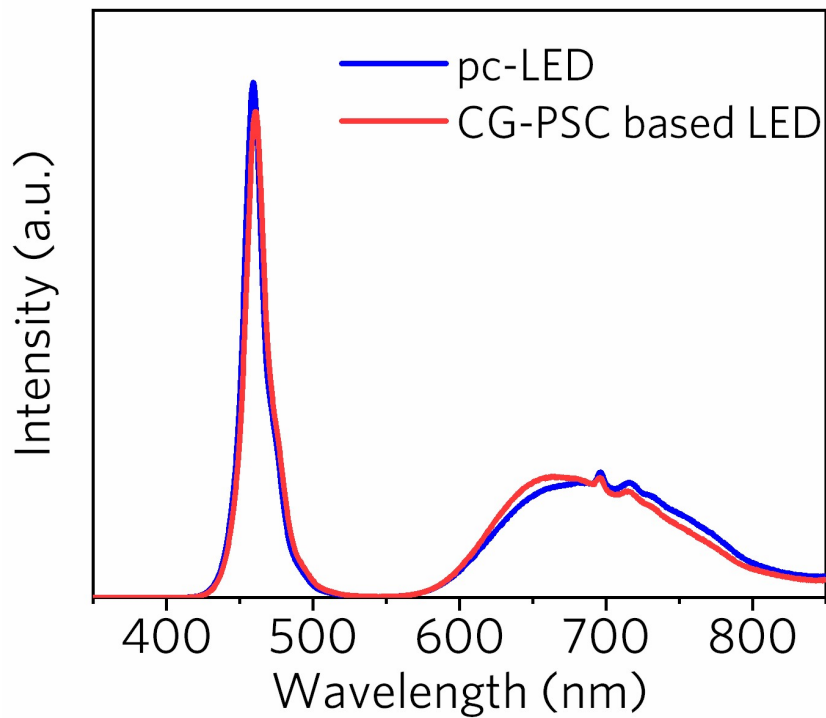

**Fig. S7.** EL spectra of pc-LED and CG-PSC based LED.
